# Supplementary material for: How do adolescents navigate COVID-19 information, and why does it matter?
Source: PubMed Central journal article supplement (PMC8709901; doi:10.7189/jogh.11.03110), 2021-12-25
Supplement: jogh-11-03110-s001.pdf [file jogh-11-03110-s001.pdf]

## Supplementary Document

**Table S1.** Sampling frame, sampling and recruitment and data collection modality

| Site                             | Participant sampling frame                                     | Participant Sampling and recruitment | Data collection modality       | Data collection dates  | Number of COVID cases in the site during data collection |
|----------------------------------|----------------------------------------------------------------|--------------------------------------|--------------------------------|------------------------|----------------------------------------------------------|
| Kinshasa, DRC                    | GEAS round 3 participants                                      | Schools, community centers and phone | In-person at community centers | November 2020          | Few or no cases                                          |
| Shanghai, China                  | GEAS round 2 participants and adolescents from a nearby school | Schools                              | In-person at school            | June 2020              | Few or no cases                                          |
| Semarang and Denpasar, Indonesia | GEAS round 1 participants                                      | Schools                              | Online                         | August 2020            | Many cases                                               |
| New Orleans, USA                 | GEAS round 1 participants                                      | Mass texting                         | Online                         | November 2020          | Many cases                                               |
| Flanders, Belgium                | GEAS round 1 participants                                      | Phone outreach via texting and phone | Online                         | September-October 2020 | Some cases                                               |

GEAS – Global Early Adolescent Study

**Table S2.** Stratification of FGDs

| Site                             | Stratification                 | Total number of FGDs       | Number of participants                                                                 |
|----------------------------------|--------------------------------|----------------------------|----------------------------------------------------------------------------------------|
| Kinshasa, DRC                    | Sex                            | 2 FGDs with boys           | 14 boys 14–18 years                                                                    |
|                                  |                                | 2 FGDs with girls          | 17 girls 14–18 years                                                                   |
| Shanghai, China                  | Sex                            | 1 FGD with older boys      | 10 boys 16–18 years                                                                    |
|                                  |                                | 1 FGD with younger boys    | 10 boys 14–15 years                                                                    |
|                                  | Age (14–15 years; 16–18 years) | 1 FGD with older girls     | 10 girls 16–18 years                                                                   |
|                                  |                                | 1 FGD with younger girls   | 10 girls 14–15 years                                                                   |
| Semarang and Denpasar, Indonesia | Sex                            | 2 FGD with lower SES boys  | 8 boys lower SES in Denpasar 14-18 years<br>6 boys lower SES in Semarang 14-18 years   |
|                                  |                                | 2 FGD with higher SES boys | 8 boys higher SES in Denpasar 14–18 years<br>7 boys higher SES in Semarang 14–18 years |
|                                  | Socio-economic status (SES)    | 2 FGD with lower SES girls | 8 girls lower SES Denpasar 14–18 years                                                 |
|                                  |                                |                            |                                                                                        |

|                   |                                                               |                                                            |                                                                                                                                 |
|-------------------|---------------------------------------------------------------|------------------------------------------------------------|---------------------------------------------------------------------------------------------------------------------------------|
|                   | (based on wealth index during baseline: lower and higher)     | 2 FGD with higher SES girls                                | 8 girls lower SES in Semarang 14–18 years<br>8 girls higher SES Denpasar 14–18 years<br>6 girls higher SES Semarang 14–18 years |
| New Orleans, USA  | Sex                                                           | 1 FGD with higher SES boys                                 | 6 boys higher SES 14–16 years                                                                                                   |
|                   | SES (based on wealth index during baseline: lower and higher) | 1 FGD with higher SES girls<br>2 FGDs with lower SES girls | 4 girls higher SES 14–16 years<br>12 girls lower SES 14–16 years                                                                |
| Flanders, Belgium | None                                                          | 2 FGDs with boys and girls together                        | 7 girls between 14 –16 years<br>3 boys between 14 –15 years                                                                     |
| <b>Total</b>      |                                                               | 22 FGDs                                                    | 161                                                                                                                             |

SES – Socio-Economic Status, FGD – Focus Group Discussions

**Table S3.** Total number of codes by site

| Thematic Code                                             | Total number of codes for the thematic group by site |                 |                                  |                  |                   |
|-----------------------------------------------------------|------------------------------------------------------|-----------------|----------------------------------|------------------|-------------------|
|                                                           | Kinshasa, DRC                                        | Shanghai, China | Semarang and Denpasar, Indonesia | New Orleans, USA | Flanders, Belgium |
| Sources of COVID information_Trustworthy                  | 9                                                    | 25              | 115                              | 3                | 7                 |
| Sources of COVID information_Trustworthy_How determined   | 11                                                   | 14              | 113                              | 5                | 15                |
| Sources of COVID information_untrustworthy                | 3                                                    | 9               | 77                               | 5                | 2                 |
| Sources of COVID information_untrustworthy_how determined | 2                                                    | 8               | 62                               | 2                | 3                 |
| Knowledge of COVID_beliefs/myths                          | 8                                                    | 18              | 13                               | 1                | 2                 |
| Knowledge of COVID_description                            | 10                                                   | 15              | 18                               | 5                | 5                 |
| Knowledge of COVID_prevention                             | 27                                                   | 122             | 156                              | 15               | 10                |
| Knowledge of COVID_spread                                 | 4                                                    | 10              | 19                               | 3                | 6                 |
| Knowledge of COVID_symptoms                               | 7                                                    | 15              | 28                               | 4                | 2                 |
| Knowledge of COVID_transmission                           | 17                                                   | 39              | 109                              | 5                | 3                 |
| Knowledge of COVID_treatment                              | 2                                                    | 1               | 2                                | 0                | 3                 |
| Attitudes about the virus_changes in perceived severity   | 9                                                    | 40              | 88                               | 13               | 20                |
| Attitudes about the virus_current perceived severity      | 15                                                   | 35              | 136                              | 8                | 5                 |
| Total number of codes                                     | 124                                                  | 351             | 936                              | 69               | 83                |
